# Supplementary material for: Multiple strategies of improving photocatalytic water splitting efficiency in 2D arsenic sesquichalcogenides
Source: Royal Society of Chemistry journal article supplement (doi:10.1039/d3cp02839a), 2023-01-01
Supplement: d3cp02839a1.pdf [file d3cp02839a1.pdf]

## Multiple Strategies of Improving Photocatalytic Water Splitting Efficiency in 2D Arsenic Sesquichalcogenides

Xiaoteng Li<sup>1,\*</sup>, Chuanlu Yang<sup>1,\*</sup>, Yuliang Liu<sup>1</sup>, Endao Han<sup>2</sup>, Wenkai Zhao<sup>1</sup>, Xinxin Jiang<sup>3</sup>, Dongqing Zou<sup>1</sup>, Yuqing Xu<sup>1</sup>

### Carrier Mobility

The carrier mobility at room temperature is obtained based on deformation potential (DP) approach, the formula as follows<sup>1</sup>:

$$\mu_{2D} = \frac{2e\hbar^3 C}{3K_B T |m^*|^2 E_d^2}$$

(S1)

$C = (\partial^2 E / \partial \varepsilon^2) / S_0$  is the elastic modulus, where  $E$  is the whole energy and  $S_0$  is the area of monolayers.  $E_d$  denotes the deformation potential constant, defined as

$$E_d = \partial E_{edge} / \partial \varepsilon. \text{ Effective mass } (m^*) \text{ is determined as } m^* = \pm \hbar^2 \left( \frac{d^2 E_k}{dk^2} \right)^{-1}.$$

Table S1 Effective carrier masses ( $m^*$ ), deformation potential constants ( $E_d$ ), elastic moduli ( $C$ ), and carrier mobility ( $\mu$ ) of  $\text{As}_2\text{X}_3$  monolayers.

| Materials                | Carrier Type  | $m^*/m_0$ | $C$ (N/m) | $E_d$ (eV) | $\mu$ ( $\text{cm}^2\text{V}^{-1}\text{s}^{-1}$ ) |
|--------------------------|---------------|-----------|-----------|------------|---------------------------------------------------|
| $\text{As}_2\text{O}_3$  | Electrons (x) | 0.92      | 26.95     | 3.80       | $0.31 \times 10^2$                                |
|                          | Hole (x)      | 0.91      |           | 2.96       | $0.53 \times 10^2$                                |
|                          | Electrons (y) | 0.84      | 50.98     | 2.2        | $0.21 \times 10^3$                                |
|                          | Hole (y)      | 0.79      |           | 4.2        | $0.66 \times 10^2$                                |
| $\text{As}_2\text{S}_3$  | Electrons (x) | 0.52      | 40.74     | 2.53       | $0.33 \times 10^3$                                |
|                          | Hole (x)      | 0.49      |           | 3.69       | $0.18 \times 10^3$                                |
|                          | Electrons (y) | 0.58      | 13.11     | 1.85       | $0.16 \times 10^3$                                |
|                          | Hole (y)      | 0.49      |           | 3.87       | $0.25 \times 10^2$                                |
| $\text{As}_2\text{Se}_3$ | Electrons (x) | 0.47      | 52.6      | 1.82       | $1.01 \times 10^3$                                |
|                          | Hole (x)      | 0.43      |           | 3.42       | $0.35 \times 10^3$                                |
|                          | Electrons (y) | 0.51      | 10.20     | 0.99       | $0.57 \times 10^3$                                |

<sup>1</sup> College of physics and optoelectronic engineering, Ludong University, Yantai 264000, People's Republic of China

<sup>2</sup> School of Physical and Mathematical Sciences, Nanyang Technological University, 50 Nanyang Avenue, 639798, Singapore

<sup>3</sup> School of Physics, State Key Laboratory of Crystal Materials, Shandong University, Jinan 250100, People's Republic of China

|                                 |               |      |       |       |                        |
|---------------------------------|---------------|------|-------|-------|------------------------|
| As <sub>2</sub> Te <sub>3</sub> | Hole (y)      | 0.25 | 65.09 | 3.79  | 0.16 × 10 <sup>3</sup> |
|                                 | Electrons (x) | 0.12 |       | 2.02  | 1.58 × 10 <sup>4</sup> |
|                                 | Hole (x)      | 0.18 | 65.48 | 1.86  | 7.46 × 10 <sup>3</sup> |
|                                 | Electrons (y) | 0.09 |       | 10.11 | 1.13 × 10 <sup>3</sup> |
|                                 | Hole (y)      | 0.18 |       | 5.46  | 0.96 × 10 <sup>3</sup> |

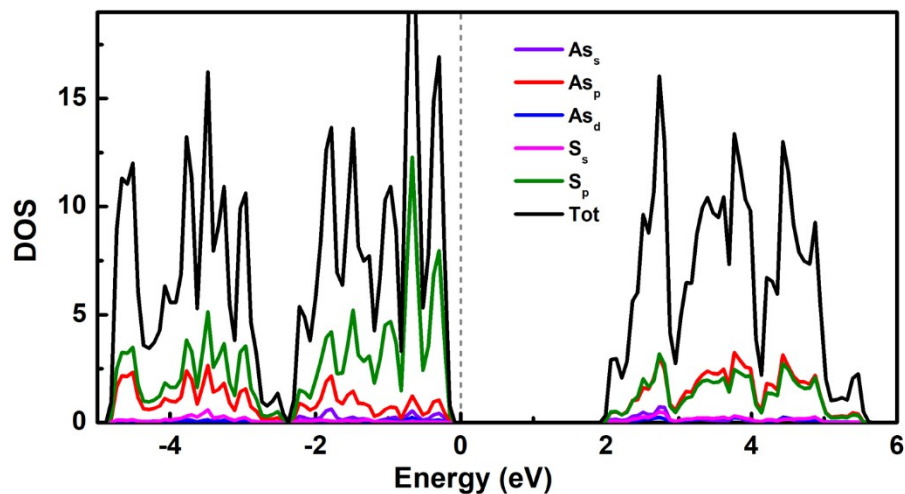

Figure S1 The calculated total and atom projected DOS of As<sub>2</sub>S<sub>3</sub>. The Fermi energy is set to zero.

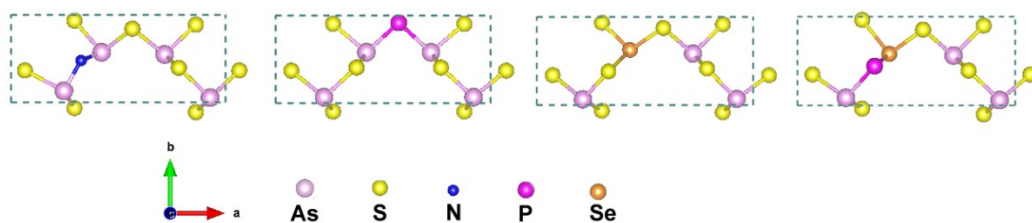

Figure S2 The crystal structures of N-doped, P-doped, and P-Se-codoped As<sub>2</sub>S<sub>3</sub> monolayers.

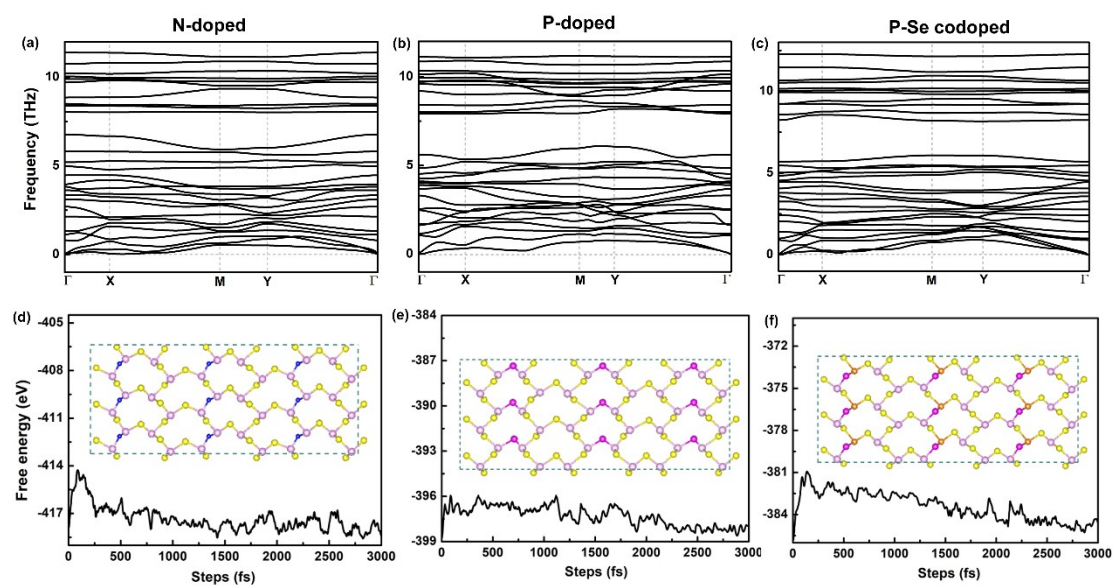

Figure S3 Phonon dispersion spectra of (a) N-doped, (b) P-doped and (c) P-Se codoped As<sub>2</sub>S<sub>3</sub>

monolayers. (d)-(f) The corresponding AIMD energy fluctuations at 300 K. The insets of (d)-(f) are the snapshots of equilibrium structure after 3ps.

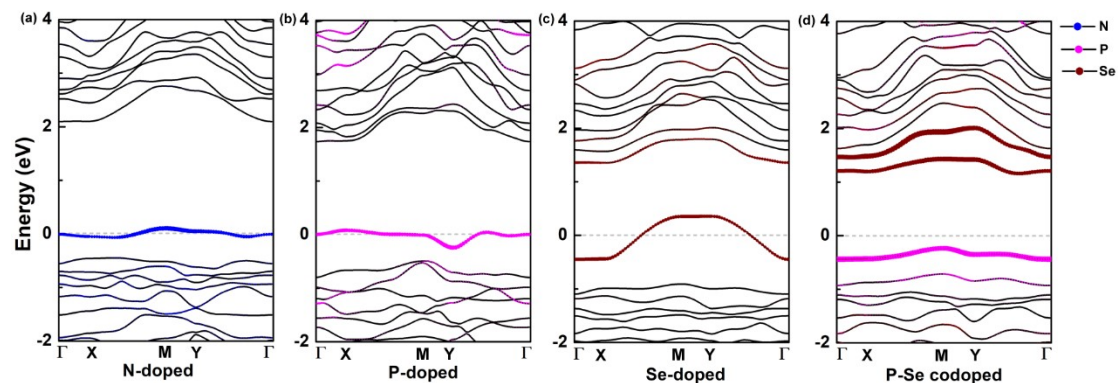

Figure S4 The projected band structures of N-, P-, Se- and P-Se doped  $\text{As}_2\text{S}_3$  monolayers.

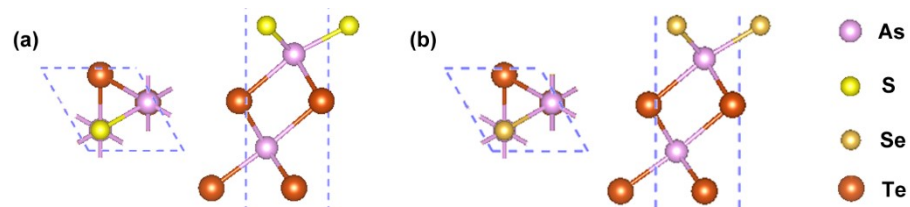

Figure S5 Top and side views of the crystal structures for (a)  $\text{As}_2\text{STe}_2$  and (b)  $\text{As}_2\text{SeTe}_2$  monolayers.

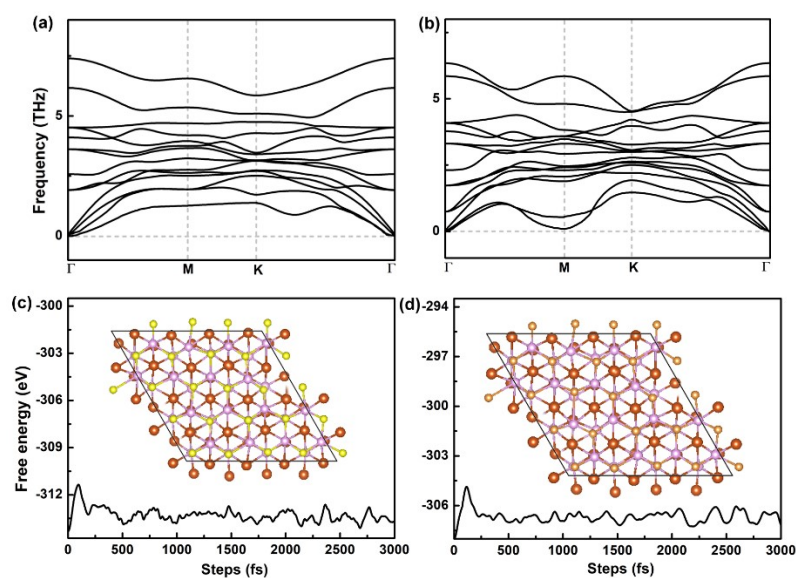

Figure S6 Phonon dispersion spectra of (a)  $\text{As}_2\text{STe}_2$  and (b)  $\text{As}_2\text{SeTe}_2$  monolayers. (c)-(d) The corresponding AIMD energy fluctuations at 300 K. The insets of (c)-(d) are the snapshots of equilibrium structure after 3ps.

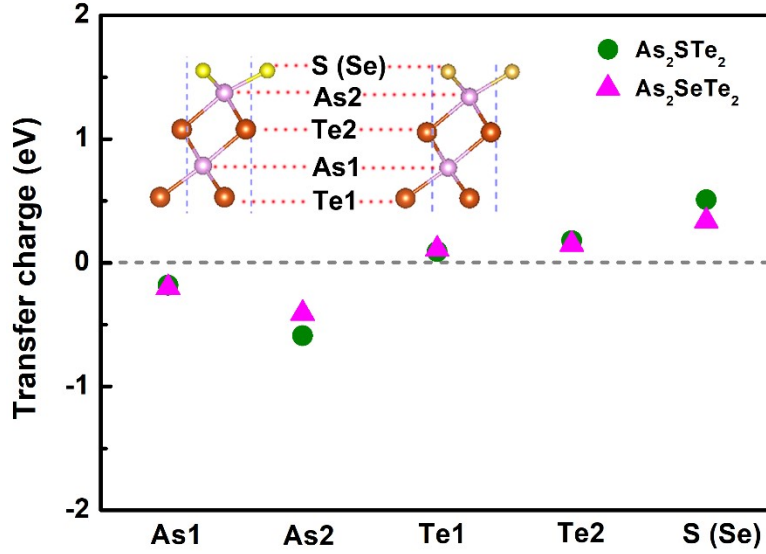

Figure S7 The transfer charges of As<sub>2</sub>STe<sub>2</sub> (As<sub>2</sub>SeTe<sub>2</sub>) monolayers.

### The Gibbs free energy

The free energy of the adsorbed states is calculated according to the formula<sup>2</sup>:

$$\Delta G = \Delta E + \Delta E_{ZPE} - T\Delta S \quad (S2)$$

where  $\Delta E$  is the adsorption energy,  $\Delta E_{ZPE}$  and  $\Delta S$  represent the variations of the zero-point energy and vibrational entropy between the adsorbed states and corresponding free-standing states, respectively.  $\Delta E_{ZPE}$  is defined as:

$$E_{ZPE} = 1/2 \sum h\nu \quad (S3)$$

where  $\nu$  stands for the vibrational frequency. TS is defined as:

$$TS = k_b T \left[ \sum_K \ln \left( \frac{1}{1 - e^{-h\nu/k_b T}} \right) + \sum_K \frac{h\nu}{k_b T} \left( \frac{1}{e^{-h\nu/k_b T} - 1} + 1 \right) \right] \quad (S4)$$

Wherein,  $e$ ,  $h$  and  $k_b$  represents the electron charge, Planck's constant and Boltzmann's constant. The value of T is 298.15K.

Here we take external potential and pH into account to evaluate the OER and HER activities. The HER process include two steps and the corresponding  $\Delta G_{H^*}$  can be

expressed as:

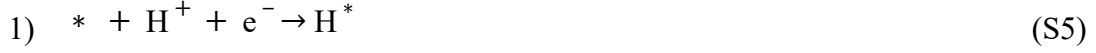

$$\begin{aligned} \Delta G_1 &= G_{\text{H}^*} - \frac{1}{2}G_{\text{H}_2} - G_* + \Delta G_U + \Delta G_{pH} \\ &= \Delta E_H + \Delta E_{ZPE(H)} - T\Delta S_H + \Delta G_U + \Delta G_{pH} \\ &= \Delta G_H \end{aligned} \quad (\text{S6})$$

While the OER contains four elementary steps and the  $\Delta G$  can be derived as follows:

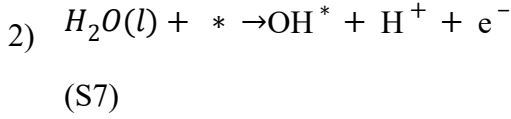

$$\begin{aligned} \Delta G_2 &= G_{\text{OH}^*} + \frac{1}{2}G_{\text{H}_2} - G_* - G_{\text{H}_2\text{O}} + \Delta G_U - \Delta G_{pH} \\ &= \Delta E_{\text{OH}} + \Delta E_{ZPE(\text{OH})} - T\Delta S_{\text{OH}} + \Delta G_U - \Delta G_{pH} \\ &= \Delta G_{\text{OH}} \end{aligned} \quad (\text{S8})$$

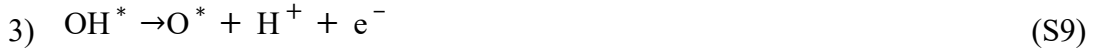

$$\begin{aligned} \Delta G_3 &= G_{\text{O}^*} + \frac{1}{2}G_{\text{H}_2} - G_{\text{OH}^*} + \Delta G_U - \Delta G_{pH} \\ &= (\Delta E_{\text{O}} + \Delta E_{ZPE(\text{O})} - T\Delta S_{\text{O}} + 2\Delta G_U - 2\Delta G_{pH}) - (\Delta E_{\text{OH}} + \Delta E_{ZPE(\text{OH})} - \Delta G_U - \Delta G_{pH}) \\ &= \Delta G_{\text{O}} - \Delta G_{\text{OH}} \end{aligned} \quad (\text{S10})$$

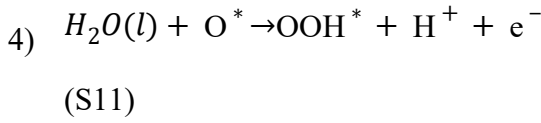

$$\begin{aligned} \Delta G_4 &= G_{\text{OOH}^*} + \frac{1}{2}G_{\text{H}_2} - G_{\text{O}^*} - G_{\text{H}_2\text{O}} + \Delta G_U - \Delta G_{pH} \\ &= (\Delta E_{\text{OOH}} + \Delta E_{ZPE(\text{OOH})} - T\Delta S_{\text{OOH}} + 3\Delta G_U - 3\Delta G_{pH}) - (\Delta E_{\text{O}} + \Delta S_{\text{O}} + 2\Delta G_U - 2\Delta G_{pH}) \\ &= \Delta G_{\text{OOH}} - \Delta G_{\text{O}} \end{aligned} \quad (\text{S12})$$

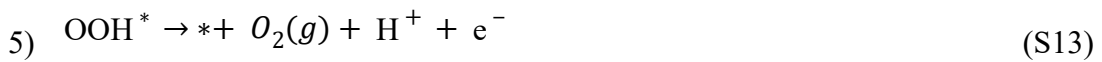

$$\Delta G_5 = G_* + \frac{1}{2}G_{\text{H}_2} + G_{\text{O}_2} - G_{\text{OOH}^*} + \Delta G_U - \Delta G_{pH}$$

$$= (4.92 + 4\Delta G_U - 4\Delta G_{pH}) - (\Delta E_{OOH} + \Delta E_{ZPE(OOH)} - T\Delta S_{OOH} + 3\Delta G_U - )$$

$$= (4.92 + 4\Delta G_U - 4\Delta G_{pH}) - \Delta G_{OOH} \quad (S14)$$

wherein,  $\Delta G_U = -eU$ , denotes extra potential bias provided by an electron in the electrode, where  $U$  represents the potential difference from the standard hydrogen electrode potential.  $\Delta G_{pH}$  is the pH-dependent  $\Delta G$ , and the corresponding formula is  $\Delta G_{pH} = k_b T \times \ln 10 \times \text{pH}$ .

### Solar-to-hydrogen (STH) efficiency

The efficiency of light absorption ( $\eta_{abs}$ ) is defined as<sup>3</sup>:

$$\eta_{abs} = \frac{\int_{E_g}^{\infty} P(\hbar\omega) d(\hbar\omega)}{\int_0^{\infty} P(\hbar\omega) d(\hbar\omega)}$$

(S17)

where  $E_g$  is the band gap of semiconductors and  $P(\hbar\omega)$  is the AM1.5 solar energy flux at the photon energy  $\hbar\omega$ . The efficiency of carrier utilization ( $\eta_{cu}$ ) is calculated by the formula:

$$\eta_{cu} = \frac{\Delta G_{H_2O} \int_E^{\infty} \frac{P(\hbar\omega)}{\hbar\omega} d(\hbar\omega)}{\int_{E_g}^{\infty} P(\hbar\omega) d(\hbar\omega)} \quad (S18)$$

where  $\Delta G_{H_2O}$  is the redox potential difference of  $H_2O$  (1.23 eV) and  $E$  is the photons energy which can be fully used for water splitting.  $E$  can be defined as:

$$E = \begin{cases} E_g, & (\chi(H_2) \geq 0.2, \chi(O_2) \geq 0.6) \\ E_g + 0.2 - \chi(H_2), & (\chi(H_2) < 0.2, \chi(O_2) \geq 0.6) \\ E_g + 0.6 - \chi(O_2), & (\chi(H_2) \geq 0.2, \chi(O_2) < 0.6) \\ E_g + 0.8 - \chi(H_2) - \chi(O_2), & (\chi(H_2) < 0.2, \chi(O_2) < 0.6) \end{cases} \quad (S19)$$

where  $\chi(H_2)$  and  $\chi(O_2)$  represent the overpotentials of HER and OER, respectively.

Then the STH efficiency is defined as:

$$\eta_{STH} = \eta_{abs} \times \eta_{cu} \quad (S20)$$

When the photocatalysts possess internal electric field, the STH efficiency will be corrected to:

$$\eta'_{STH} = \eta_{STH} \times \frac{\int_0^{\infty} P(\hbar\omega) d(\hbar\omega)}{\Delta\Phi \int_{E_g}^{\infty} \frac{P(\hbar\omega)}{\hbar\omega} d(\hbar\omega) + \int_0^{\infty} P(\hbar\omega) d(\hbar\omega)}$$

(S21)

where  $\Delta\Phi$  is the vacuum level difference between the two respective surfaces.

**Table S2** The overpotentials for HER ( $\chi(H_2)$ ) and OER ( $\chi(O_2)$ ), the photons energy ( $E$ ), the efficiency of light absorption ( $\eta_{abs}$ ) and carrier utilization ( $\eta_{cu}$ ), and corrected STH ( $\eta'_{STH}$ ).

| Materials                         | $\chi(H_2)$ (eV) | $\chi(O_2)$ (eV) | $E$ (eV) | $\eta_{abs}$ (%) | $\eta_{cu}$ (%) | $\eta'_{STH}$ (%) |
|-----------------------------------|------------------|------------------|----------|------------------|-----------------|-------------------|
| As <sub>2</sub> STe <sub>2</sub>  | 0.33             | 0.51             | 1.10     | 84.67            | 64.21           | 36.19             |
| As <sub>2</sub> SeTe <sub>2</sub> | 0.19             | 0.13             | 1.45     | 87.19            | 43.61           | 29.36             |

## References

1. J. Xi, M. Long, L. Tang, D. Wang and Z. Shuai, *Nanoscale*, 2012, **4**, 4348-4369.
2. J.K. Nørskov, J. Rossmeisl, A. Logadottir, L. Lindqvist, J. R. Kitchin, T. Bligaard, and H. Jónsson, *Journal of Physical Chemistry B*, 2004, **108**, 17886-17892.

3. Z. Chen, T. F. Jaramillo, T. G. Deutsch, A. Kleiman-Shwarsctein, A. J. Forman, N. Gaillard, R. Garland, K. Takanabe, C. Heske, M. Sunkara, E. W. McFarland, K. Domen, E. L. Miller, J. A. Turner and H. N. Dinh, *Journal of Materials Research*, 2011, **25**, 3-16.
