# Supplementary material for: Multiple strategies of improving photocatalytic water splitting efficiency in 2D arsenic sesquichalcogenides
Source: Royal Society of Chemistry journal article supplement (doi:10.1039/d3cp02839a), 2023-01-01
Supplement: d3cp02839a2.pdf [file d3cp02839a2.pdf]

Table S1 Effective carrier masses ( $m^*$ ), deformation potential constants ( $E_d$ ), elastic moduli ( $C$ ), and carrier mobility ( $\mu$ ) of  $\text{As}_2\text{X}_3$  monolayers.

| Materials                | Carrier Type  | $m^*/m_0$ | $C$ (N/m) | $E_d$ (eV) | $\mu$ ( $\text{cm}^2\text{V}^{-1}\text{s}^{-1}$ ) |
|--------------------------|---------------|-----------|-----------|------------|---------------------------------------------------|
| $\text{As}_2\text{O}_3$  | Electrons (x) | 0.92      | 26.95     | 3.80       | $0.31 \times 10^2$                                |
|                          | Hole (x)      | 0.91      |           | 2.96       | $0.53 \times 10^2$                                |
|                          | Electrons (y) | 0.84      | 50.98     | 2.2        | $0.21 \times 10^3$                                |
|                          | Hole (y)      | 0.79      |           | 4.2        | $0.66 \times 10^2$                                |
| $\text{As}_2\text{S}_3$  | Electrons (x) | 0.52      | 40.74     | 2.53       | $0.33 \times 10^3$                                |
|                          | Hole (x)      | 0.49      |           | 3.69       | $0.18 \times 10^3$                                |
|                          | Electrons (y) | 0.58      | 13.11     | 1.85       | $0.16 \times 10^3$                                |
|                          | Hole (y)      | 0.49      |           | 3.87       | $0.25 \times 10^2$                                |
| $\text{As}_2\text{Se}_3$ | Electrons (x) | 0.47      | 52.6      | 1.82       | $1.01 \times 10^3$                                |
|                          | Hole (x)      | 0.43      |           | 3.42       | $0.35 \times 10^3$                                |
|                          | Electrons (y) | 0.51      | 10.29     | 0.99       | $0.57 \times 10^3$                                |
|                          | Hole (y)      | 0.25      |           | 3.79       | $0.16 \times 10^3$                                |
| $\text{As}_2\text{Te}_3$ | Electrons (x) | 0.12      | 65.09     | 2.02       | $1.58 \times 10^4$                                |
|                          | Hole (x)      | 0.18      |           | 1.86       | $7.46 \times 10^3$                                |
|                          | Electrons (y) | 0.09      | 65.48     | 10.11      | $1.13 \times 10^3$                                |
|                          | Hole (y)      | 0.18      |           | 5.46       | $0.96 \times 10^3$                                |

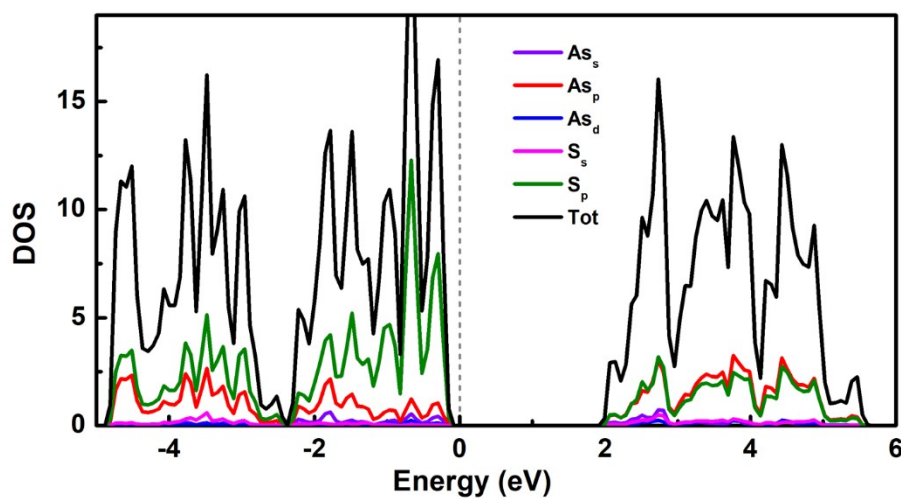

Figure S1 The calculated total and atom projected DOS of  $\text{As}_2\text{S}_3$ . The Fermi energy is set to zero.

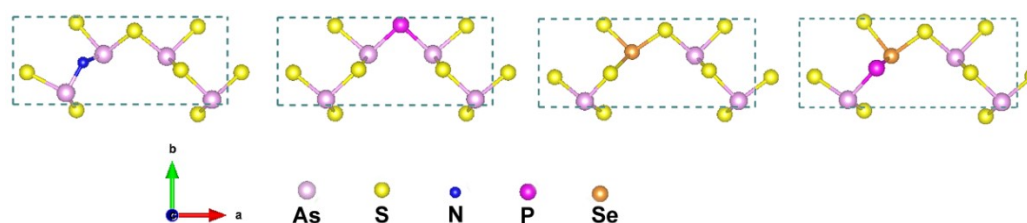

Figure S2 The crystal structures of N-doped, P-doped, and P-Se-codoped  $\text{As}_2\text{S}_3$  monolayers.

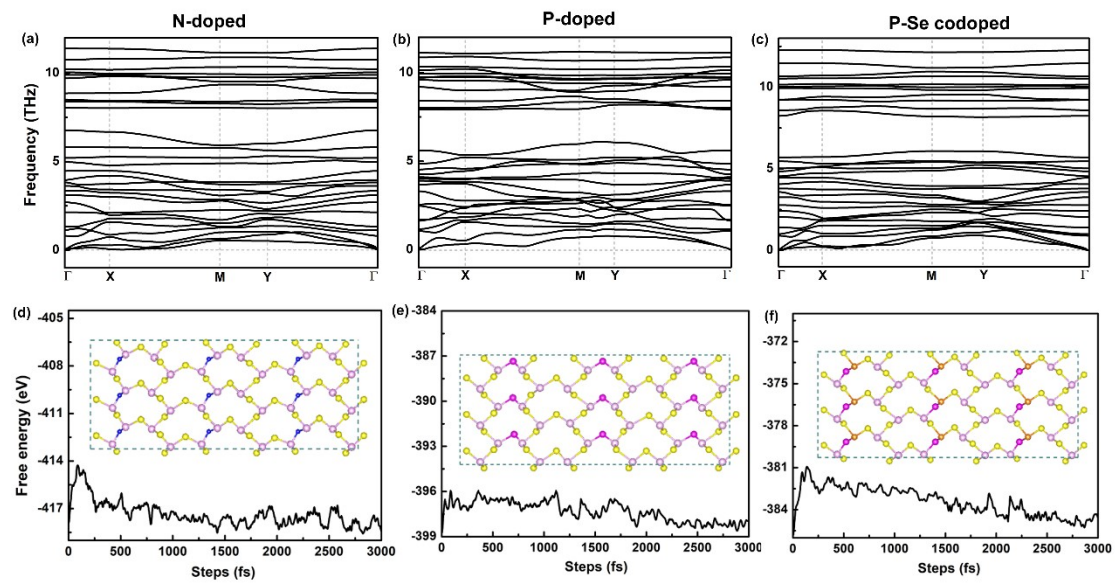

Figure S3 Phonon dispersion spectra of (a) N-doped, (b) P-doped and (c) P-Se codoped  $\text{As}_2\text{S}_3$  monolayers. (d)-(f) The corresponding AIMD energy fluctuations at 300 K. The insets of (d)-(f) are the snapshots of equilibrium structure after 3ps.

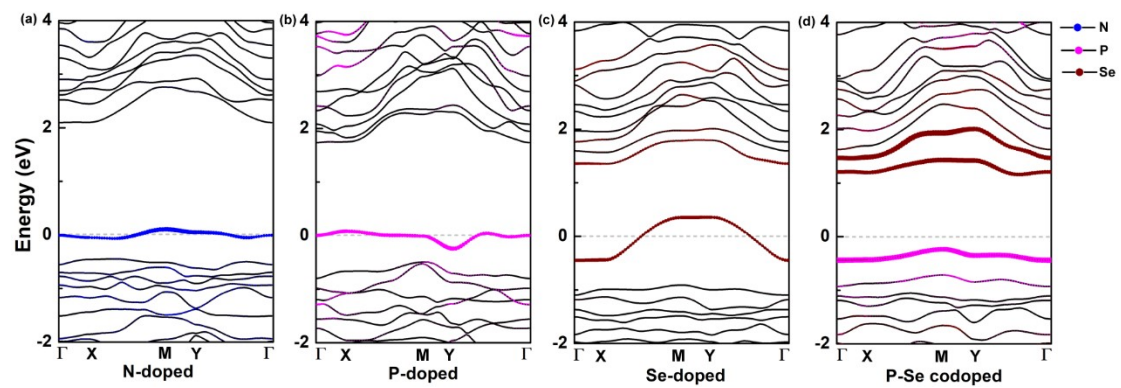

Figure S4 The projected band structures of N-, P-, Se- and P-Se doped  $\text{As}_2\text{S}_3$  monolayers.

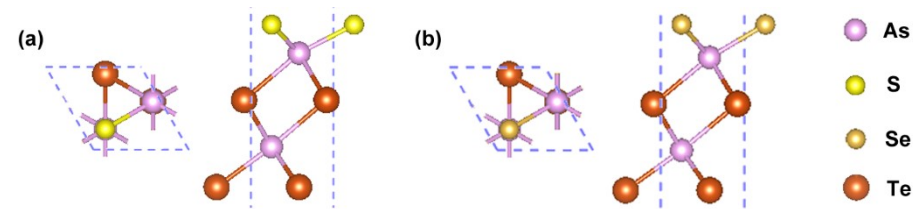

Figure S5 Top and side views of the crystal structures for (a)  $\text{As}_2\text{STe}_2$  and (b)  $\text{As}_2\text{SeTe}_2$  monolayers.

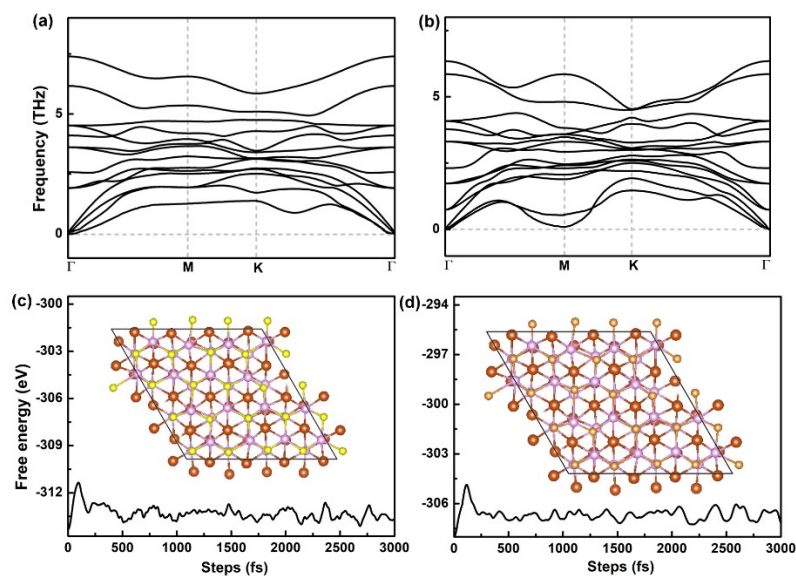

Figure S6 Phonon dispersion spectra of (a)  $\text{As}_2\text{STe}_2$  and (b)  $\text{As}_2\text{SeTe}_2$  monolayers. (c)-(d) The corresponding AIMD energy fluctuations at 300 K. The insets of (c)-(d) are the snapshots of equilibrium structure after 3ps.

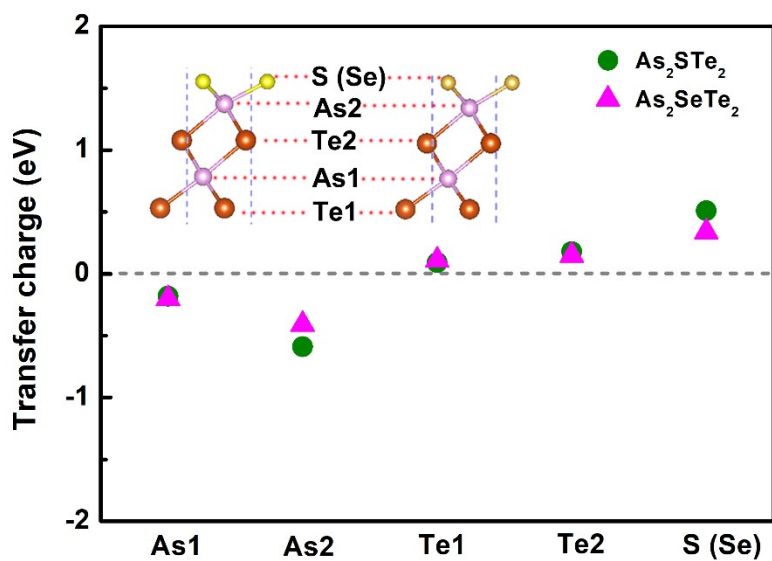

Figure S7 The transfer charges of  $\text{As}_2\text{STe}_2$  ( $\text{As}_2\text{SeTe}_2$ ) monolayers.

**Table S2** The overpotentials for HER ( $\chi(\text{H}_2)$ ) and OER ( $\chi(\text{O}_2)$ ), the photons energy ( $E$ ), the efficiency of light absorption ( $\eta_{abs}$ ) and carrier utilization ( $\eta_{cu}$ ), and corrected STH ( $\eta'_{STH}$ ).

| Materials                         | $\chi(\text{H}_2)(\text{eV})$ | $\chi(\text{O}_2)(\text{eV})$ | $E$ (eV) | $\eta_{\text{abs}}(\%)$ | $\eta_{\text{cu}}(\%)$ | $\eta'_{\text{STH}}(\%)$ |
|-----------------------------------|-------------------------------|-------------------------------|----------|-------------------------|------------------------|--------------------------|
| As <sub>2</sub> STe <sub>2</sub>  | 0.33                          | 0.51                          | 1.10     | 84.67                   | 64.21                  | 36.19                    |
| As <sub>2</sub> SeTe <sub>2</sub> | 0.19                          | 0.13                          | 1.45     | 87.19                   | 43.61                  | 29.36                    |
